# Supplementary material for: Magnesium uptake by connecting fluid-phase endocytosis to an intracellular inorganic cation filter
Source: PubMed Central journal article supplement (PMC5709425; doi:10.1038/s41467-017-01930-5), 2017-12-01
Supplement: 41467_2017_1930_MOESM1_ESM.pdf [file 41467_2017_1930_MOESM1_ESM.pdf]

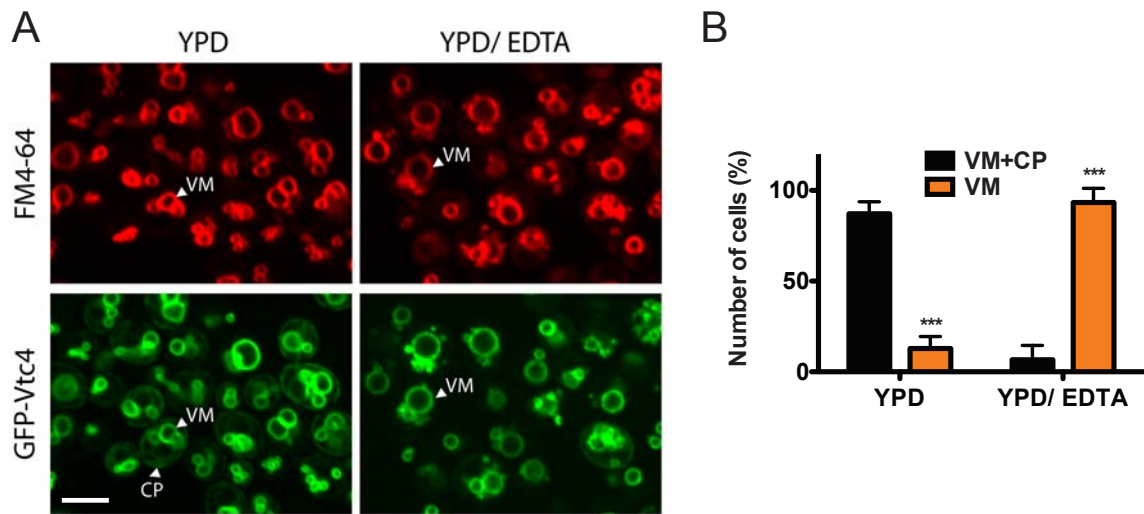

**Supplementary Figure 1: Vtc4 localization under metal limitation.**

**(A)** Wildtype cells, expressing genomically integrated GFP-Vtc4, were pre-cultured on YPD to early-logarithmic growth phase and stained with FM4-64. Cells were then transferred into YPD or YPD/EDTA and analyzed by confocal microscopy after 6 hours of growth. VM: vacuolar membrane, CP: cell periphery. Scale bar: 5  $\mu$ m. **(B)** Quantification of GFP-Vtc4 localization. 60 cells were analysed per condition and experiment. Results represent mean  $\pm$  SD of three independent experiments. Statistical differences were determined using Student's t-test comparing the localization of GFP-Vtc4 on YPD versus YPD/EDTA; \*\*\* $p \leq 0.0005$ .

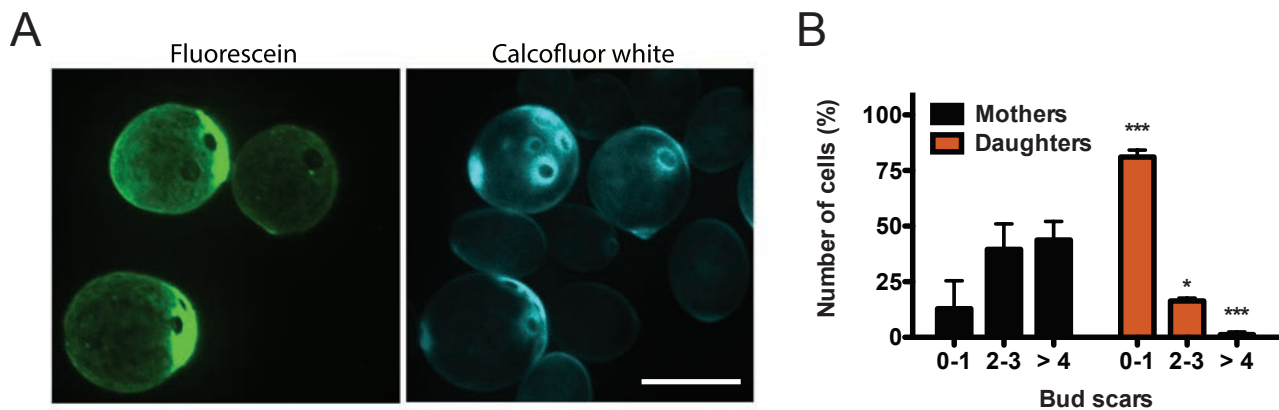

**Supplementary Figure 2: Growth of mother and daughter cells on YPD/EDTA.**

Wildtype cells were pre-cultured on YPD. The cell walls of the inoculum were chemically cross-linked to sulfo-NHS-LC-LC-biotin and then stained with fluorescein-conjugated avidin. After washing and cultivation for 16 hours on YPD/EDTA, the cells were collected. Bud scars were stained with Calcofluor white and analyzed by confocal microscopy. **(A)** Maximum projection of z-stacks of 30 optical sections of biotinylated mother cells stained with fluorescein-avidin, taken at 0.3  $\mu\text{m}$  intervals. Scale bar: 5  $\mu\text{m}$ . **(B)** Quantification of A. Results represent mean  $\pm$  SD of three independent experiments. 250 cells were analysed per experiment. Statistical differences were determined using Student's t-test comparing the number of bud scars between mother and daughter populations; \* $p \leq 0.05$ , \*\*\* $p \leq 0.001$ .

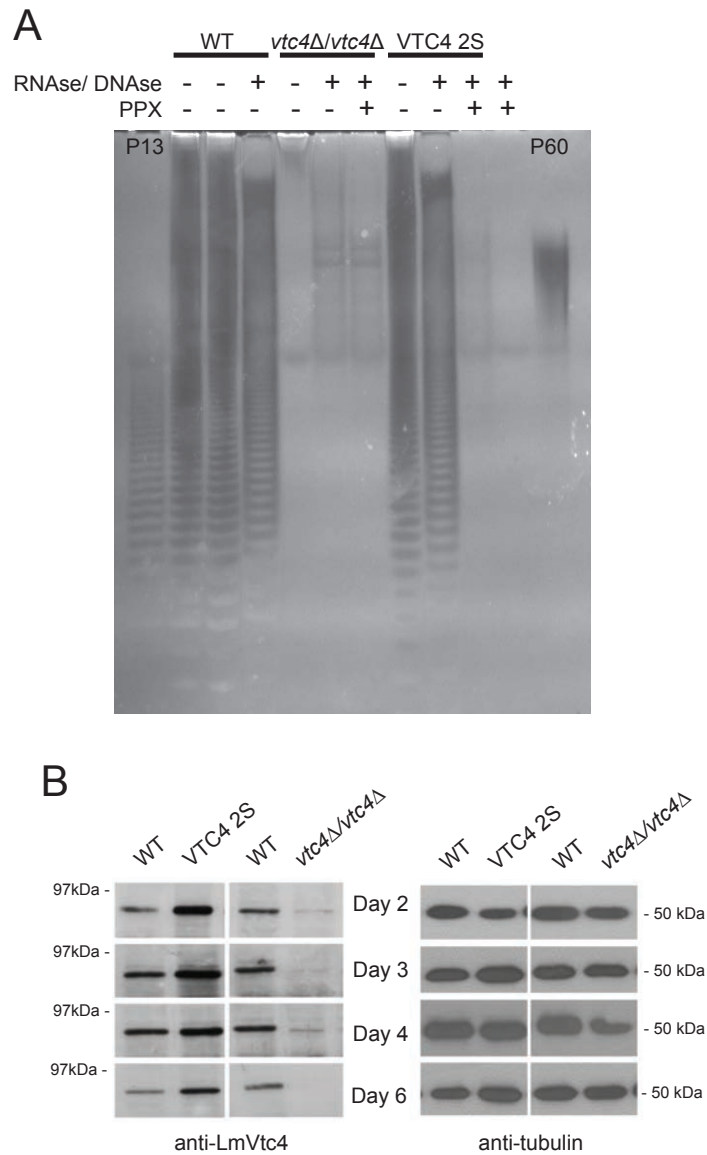

### Supplementary Figure 3: Characterization of *Leishmania major* mutants

(A) Gel analysis of polyP levels. Promastigotes of wildtype, a double-knockout of LmVTC4 (*vtc4Δ/vtc4Δ*) and of the double-knockout reconstituted with a wildtype allele of LmVTC4 (VTC4 2S) were inoculated in M199 medium. PolyP was extracted from logarithmically grown cells and analyzed by 35% gel electrophoresis and DAPI staining. Samples were treated with RNAse/DNase and the polyphosphatase Ppx1 as indicated. (B) Vtc4 abundance at different growth phases. At the indicated times after inoculation in M199 medium, aliquots were withdrawn and cells lysed by 5 successive freeze/ thaw cycles in the presence of protease inhibitors. Protein extracts were analyzed by SDS-PAGE and Western blotting against LmVtc4 or tubulin. 20  $\mu$ g protein were loaded per lane.

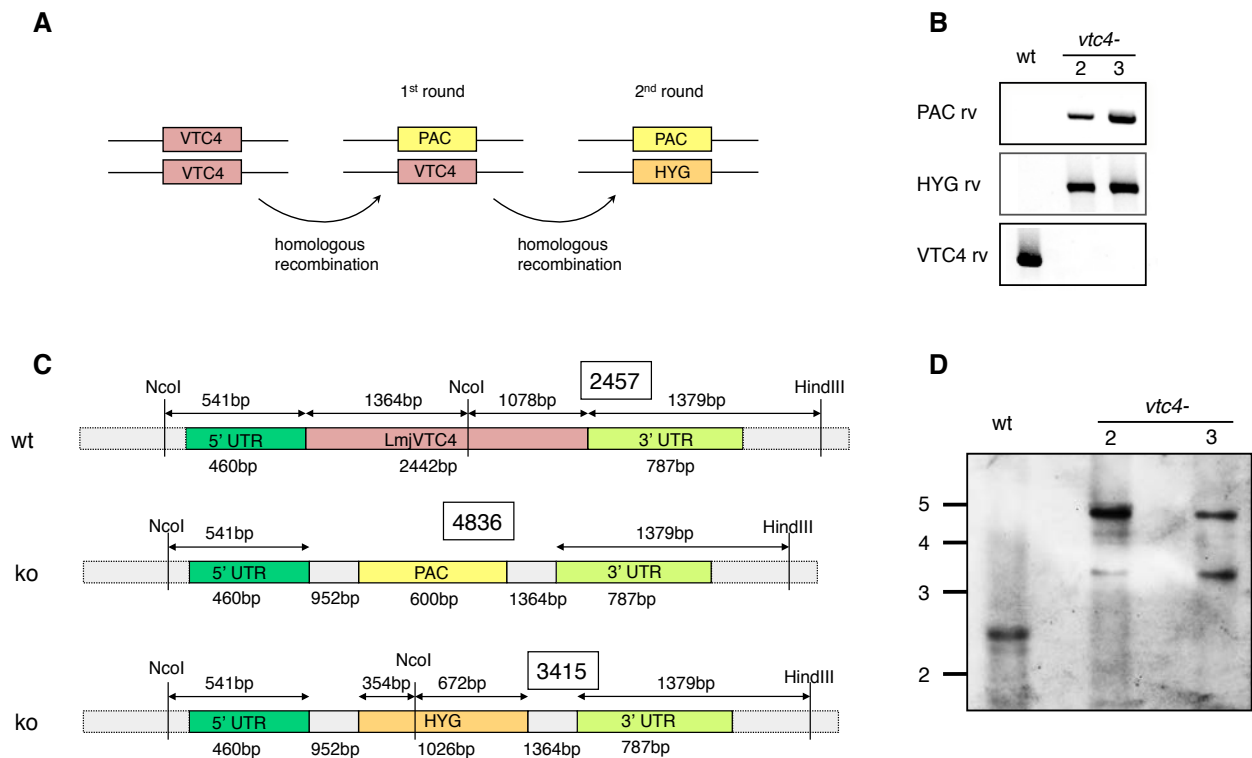

#### Supplementary Fig. 4: *VTC4* knock-out in *L. major*

(A) The two alleles of the single copy *LmVTC4* gene were replaced by drug resistance genes in two subsequent rounds of homologous recombination. Gene replacement was verified (B) by PCR, employing the same forward primer with reverse primers annealing in the respective genes, and (C-D) by southern blot. Genomic DNA was digested by *NcoI* and *HindIII*, and fragments were hybridized with a 3'UTR specific probe. Restriction sites and expected sizes of the labeled fragments are displayed in C. Each allelic combination gives rise to a fragment of a different size, thereby showing one band for wt and two bands for *vtc4*<sup>-</sup> clones. PAC, puromycin-resistance gene; HYG, hygromycin-resistance gene; UTR, untranslated region.

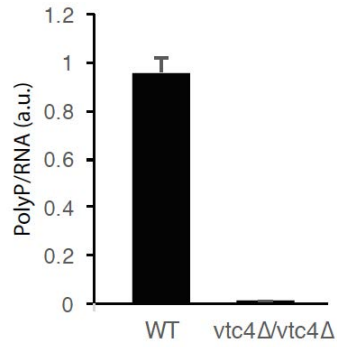

**Supplementary Fig. 5: PolyP content of *Leishmania*, measured by enzymatic degradation**

PolyP levels during promastigote growth. Promastigotes of wildtype and a double-knockout of LmVTC4 (*vtc4Δ vtc4Δ*) were inoculated in M199 medium. In logarithmic phase, they were analyzed for their polyP content. PolyP was isolated through phenol/chloroform extraction and degraded by incubation with purified yeast Ppx1. Released orthophosphate was quantified by malachite green. Results represent mean  $\pm$  SD of three independent experiments.

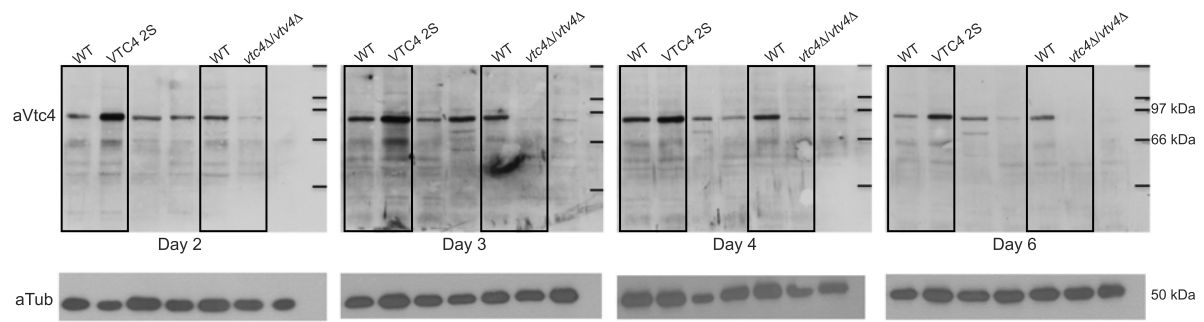

**Supplementary Fig. 6: Non-cropped scans of blots in SFig. 3B.**

Lanes used in that figure are surrounded by a black rectangle.

Supplementary Table 1: Yeast strains

| Strain                              | Genotype                                                                                                                                           | Reference/ Source  |
|-------------------------------------|----------------------------------------------------------------------------------------------------------------------------------------------------|--------------------|
| BY4741                              | MAT $\alpha$ his3 $\Delta$ 1 leu2 $\Delta$ 0 met15 $\Delta$ 0 ura3 $\Delta$ 0                                                                      | Thermo Scientific  |
| BY4741 <i>vtc4</i> $\Delta$         | BY4741 <i>vtc4</i> ::kanMX                                                                                                                         | Euroscarf          |
| BY4741 <i>vtc1</i> $\Delta$         | BY4741 <i>vtc1</i> ::kanMX                                                                                                                         | Euroscarf          |
| BY4741 <i>vtc3</i> $\Delta$         | BY4741 <i>vtc3</i> ::kanMX                                                                                                                         | Euroscarf          |
| BY4742 <i>Vtc4</i> <sup>R264A</sup> | MAT $\alpha$ his3 $\Delta$ 1 leu2 $\Delta$ 0 lys2 $\Delta$ 0 ura3 $\Delta$ 0 <i>vtc4</i> ::kanMX<br>P <sub>VTC4</sub> VTC4 <sup>R264A</sup> (HIS3) | Hothorn, 2009      |
| BY4742<br>GFP-VTC4                  | MAT $\alpha$ his3 $\Delta$ 1 leu2 $\Delta$ 0 lys2 $\Delta$ 0 ura3 $\Delta$ 0 P <sub>ADH</sub> GFP-VTC4 (natNT2)                                    | Uttenweiler, 2007  |
| DY1457                              | MAT $\alpha$ ade6 can1 his3 leu2 trp1 ura3                                                                                                         | D. Eide, Wisconsin |
| DY1457 <i>alr1</i> $\Delta$         | DY1457 <i>alr1</i> ::HIS3                                                                                                                          | D. Eide, Wisconsin |
| BY4741 <i>mnr2</i> $\Delta$         | BY4741 <i>mnr2</i> ::kanMX                                                                                                                         | Euroscarf          |
| BY4741 <i>alr2</i> $\Delta$         | BY4741 <i>alr2</i> ::kanMX                                                                                                                         | Euroscarf          |
| BY4741 <i>mrs2</i> $\Delta$         | BY4741 <i>mrs2</i> ::kanMX                                                                                                                         | Euroscarf          |
| BY4741 <i>mfm1</i> $\Delta$         | BY4741 <i>mfm1</i> ::kanMX                                                                                                                         | Euroscarf          |
| BY4741 <i>mme1</i> $\Delta$         | BY4741 <i>mme1</i> ::kanMX                                                                                                                         | Euroscarf          |
| DTY165 <i>ctr2</i> $\Delta$         | MAT $\alpha$ <i>ura3-52 his6 leu2-3,-112 his3-<math>\Delta</math>200 trp1-901 lys2-801</i><br><i>suc2-<math>\Delta</math> ctr2</i> ::HIS3          | Rees, 2004         |
| BY4741 <i>fth1</i> $\Delta$         | BY4741 <i>fth1</i> ::kanMX                                                                                                                         | Euroscarf          |
| BY4741 <i>smf3</i> $\Delta$         | BY4741 <i>smf3</i> ::kanMX                                                                                                                         | Euroscarf          |
| BY4741 <i>yvc1</i> $\Delta$         | BY4741 <i>yvc1</i> ::kanMX                                                                                                                         | Euroscarf          |
| BY4741 <i>zrt3</i> $\Delta$         | BY4741 <i>zrt3</i> ::kanMX                                                                                                                         | Euroscarf          |
| BY4741 <i>vps4</i> $\Delta$         | BY4741 <i>vps4</i> ::kanMX                                                                                                                         | Euroscarf          |
| BY4741 <i>atg8</i> $\Delta$         | BY4741 <i>atg8</i> ::kanMX                                                                                                                         | Euroscarf          |
| BY4741 <i>sac6</i> $\Delta$         | BY4741 <i>sac6</i> ::kanMX                                                                                                                         | Euroscarf          |
| BY4741 <i>vrp1</i> $\Delta$         | BY4741 <i>vrp1</i> ::kanMX                                                                                                                         | Euroscarf          |
| BY4741 <i>end3</i> $\Delta$         | BY4741 <i>end3</i> ::kanMX                                                                                                                         | Euroscarf          |
| BY4741 <i>sla1</i> $\Delta$         | BY4741 <i>sla1</i> ::kanMX                                                                                                                         | Euroscarf          |
| BY4741 <i>arc18</i> $\Delta$        | BY4741 <i>arc18</i> ::kanMX                                                                                                                        | Euroscarf          |
| BY4741 <i>vps26</i> $\Delta$        | BY4741 <i>vps26</i> ::kanMX                                                                                                                        | Euroscarf          |
| BY4741 <i>vps29</i> $\Delta$        | BY4741 <i>vps29</i> ::kanMX                                                                                                                        | Euroscarf          |
| BY4741 <i>vps35</i> $\Delta$        | BY4741 <i>vps35</i> ::kanMX                                                                                                                        | Euroscarf          |

Supplementary table 2: Oligonucleotides used in this study

| Name                             | Sequence (5' --> 3')                  | Purpose                     |
|----------------------------------|---------------------------------------|-----------------------------|
| AS12                             | GCCCATTTATACCCATAT                    | KO check Kan rv             |
| AS267                            | GAGCTGTCGCAAACAAGTTCG                 | KO check VTC4 fw            |
| YD012                            | TATCGCTTGTTACGGTCGGT                  | KO check VTC1 fw            |
| AS235                            | TCCAAGTAGTACCTCCTTAGCGC               | KO check VTC3 fw            |
| SK114                            | CATTTTCTGGTTTGGTAGTCC                 | KO check MNR2 fw            |
| SK115                            | GACGGTAGAGACTACTATTGC                 | KO check ALR2 fw            |
| SK116                            | GATTGATCGACCAGCAGCTTG                 | KO check MRS2 fw            |
| SK117                            | CAATGTAGTAGCCACCTCA                   | KO check FTH1 fw            |
| SK118                            | CTGATTCTGTGAGGTTGC                    | KO check SMF3 fw            |
| SK119                            | CACTGTTGCTATGTCGGAG                   | KO check YVC1 fw            |
| SK120                            | GAGATGATTTACCTACTGG                   | KO check ZRT3 fw            |
| SK121                            | CACAACACGTCATGGTTGTTTC                | KO check VPS4 fw            |
| SK122                            | CCGTGAAATCATAGCACATG                  | KO check ATG8 fw            |
| SK123                            | GATCCTGACCGGATATAGGGTC                | KO check SAC6 fw            |
| SK124                            | CATAACCTAGTCACTGCTTACG                | KO check VRP1 fw            |
| SK125                            | GACGATCGTGTAGGACCC                    | KO check END3 fw            |
| SK126                            | CTCTCAGTTTCACAGACTCG                  | KO check ARC18 fw           |
| SK127                            | CGAAATCGAGATACATCAGAC                 | KO check SLA1 fw            |
| <b>vps26 fw</b>                  | <b>TCGACAAACCCGTATAAGAC</b>           | KO check VPS26 fw           |
| <b>vps29 fw</b>                  | <b>TTAACCGTAGCATCATTGTG</b>           | KO check VPS29 fw           |
| <b>vps35 fw</b>                  | <b>AAGATTGTTGATTGGATTGC</b>           | KO check VPS35 fw           |
| <b>LmjVtc4_5'up fw (HindIII)</b> | <b>CACAAGCTTAGCGAAGCCAAGCCGCTC</b>    | 5'UTR into pX63 KO cassette |
| <b>LmjVtc4_5'lo rv (Sall)</b>    | <b>CTAGTCGACGATGGTGCGGGGCGCC</b>      | 5'UTR into pX63 KO cassette |
| <b>LmjVtc4_3'up fw (SmaI)</b>    | <b>CATCCCGGGCGGTGCGCGTGC GTTGC</b>    | 3'UTR into pX63 KO cassette |
| <b>LmjVtc4_3'lo fw (BglII)</b>   | <b>GACAGATCTGAGGGAGCGGTTCCGGTTC</b>   | 3'UTR into pX63 KO cassette |
| <b>fw-ClalLmjVtc4st</b>          | <b>CATATCGATATGCCGTACAGCAAGGCATGG</b> | LmVtc4 into pSSU vector     |
| <b>Rv-Xmal-LmjVtc4en</b>         | <b>CATCCCGGGCTAGAACGAGTCGCTGCCTGT</b> | LmVtc4 into pSSU vector     |
| <b>NEO fw (SpeI)</b>             | <b>CATATCGATATGCCGTACAGCAAGGCATGG</b> | NEO into pSSU vector        |



|                        |                                |                                 |
|------------------------|--------------------------------|---------------------------------|
| <b>NEO rv (XbaI)</b>   | CATATCGATATGCCGTACAGCAAGGCATGG | NEO into pSSU vector            |
| <b>IRcpbXmaI-sense</b> | GGACCCGGGTGTGTGCCCTTGTGTGCGT   | CPB IR into pSSU vector         |
| <b>IRcpbSpeI-anti</b>  | GGCACTAGTTCTAGTCGCGGACGCGG     | CPB IR into pSSU vector         |
| <b>k.o. genomic fw</b> | GAGTTCATCCCCTGCTCATGCT         | PCR check Lm $\Delta$ vtc4/vtc4 |
| <b>k.o. Vtc4.90 rv</b> | GAGGATGTCCTTGGTTGCCTTGT        | PCR check Lm $\Delta$ vtc4/vtc4 |
| <b>k.o. PAC.151 rv</b> | CTCAGTTCTTGCAGCTCGGTGAC        | PCR check Lm $\Delta$ vtc4/vtc4 |
| <b>k.o. Hyg.2 rv</b>   | GGTGAGTTCAGGCTTTTCA            | PCR check Lm $\Delta$ vtc4/vtc4 |

Supplementary Table 3: Element composition of YPD and metal-depleted YPD, determined by ICP-MS. Means +/- SD from three independent measurements are given.

| Metal | YPD ( $\mu\text{M}$ ) | YPD/ Chelex ( $\mu\text{M}$ ) |
|-------|-----------------------|-------------------------------|
| Mg    | $167.5 \pm 8.3$       | $7.3 \pm 5.2$                 |
| Fe    | $10.9 \pm 0.01$       | $2.5 \pm 0.05$                |
| Mn    | $0.67 \pm 0.3$        | $< 0.18$                      |
| Zn    | $19.6 \pm 1.3$        | $0.8 \pm 0.4$                 |
| Ca    | $253.3 \pm 1.8$       | $10.5 \pm 0.01$               |
| Cu    | $0.75 \pm 0.05$       | $0.66 \pm 0.06$               |
